# Supplementary material for: Psychometric properties of the Brazilian Portuguese version of the Copenhagen Burnout Inventory (CBI) in healthcare professionals
Source: PubMed Central journal article supplement (PMC10416248; doi:10.47626/2237-6089-2021-0362), 2023-06-27
Supplement: 2238-0019-trends-45-e20210362-suppl1.pdf [file 2238-0019-trends-45-e20210362-suppl1.pdf]

## **Supplementary Material S1** - Brazilian Portuguese version of The Copenhagen Burnout Inventory (CBI) adapted for healthcare professionals

### **Burnout Pessoal**

**PB1 Com que frequência você se sente cansado (a)?**

- Sempre
- Frequentemente
- Às vezes
- Raramente
- Nunca

**PB2 Com que frequência você fica exausto (a) fisicamente?**

- Sempre
- Frequentemente
- Às vezes
- Raramente
- Nunca

**PB3 Com que frequência você fica exausto (a) emocionalmente?**

- Sempre
- Frequentemente
- Às vezes
- Raramente
- Nunca

**PB4 Com que frequência você pensa: “Eu não aguento mais”?**

- Sempre
- Frequentemente
- Às vezes
- Raramente
- Nunca

**PB5 Com que frequência você se sente esgotado (a)?**

- Sempre
- Frequentemente
- Às vezes
- Raramente
- Nunca

**PB6 Com que frequência você se sente fraco (a) e suscetível à doença?**

- Sempre
- Frequentemente
- Às vezes
- Raramente
- Nunca

### **Burnout relacionado ao trabalho**

**WB1 Você se sente esgotado (a) no fim de um dia de trabalho?**

- Sempre
- Frequentemente
- Às vezes
- Raramente
- Nunca

**WB2 Você fica exausto (a) pela manhã ao pensar em mais um dia de trabalho?**

- Sempre
- Frequentemente
- Às vezes
- Raramente
- Nunca

**WB3 Você se sente mais cansado a cada hora de trabalho?**

- Sempre
- Frequentemente
- Às vezes
- Raramente
- Nunca

**WB4 Você tem energia suficiente para família e amigos durante os momentos de lazer?**

- Sempre
- Frequentemente
- Às vezes
- Raramente
- Nunca

**WB5 O seu trabalho é exaustivo emocionalmente?**

- Em um grau muito alto
- Em um grau alto
- Em algum grau
- Em baixo grau
- Em um grau muito baixo

**WB6 O seu trabalho lhe frustra?**

- Em um grau muito alto
- Em um grau alto
- Em algum grau
- Em baixo grau
- Em um grau muito baixo

**WB7 Você se sente esgotado por causa do seu trabalho?**

- Em um grau muito alto
- Em um grau alto
- Em algum grau
- Em baixo grau
- Em um grau muito baixo

**Burnout relacionado aos pacientes**

**CB1 Você acha difícil trabalhar com pacientes?**

- Em um grau muito alto
- Em um grau alto
- Em algum grau
- Em baixo grau
- Em um grau muito baixo

**CB2 Trabalhar com pacientes suga a sua energia?**

- Em um grau muito alto
- Em um grau alto

- Em algum grau
- Em baixo grau
- Em um grau muito baixo

**CB3 Você acha frustrante trabalhar com pacientes?**

- Em um grau muito alto
- Em um grau alto
- Em algum grau
- Em baixo grau
- Em um grau muito baixo

**CB4 Você sente que está dando mais do que recebe quando você trabalha com pacientes?**

- Em um grau muito alto
- Em um grau alto
- Em algum grau
- Em baixo grau
- Em um grau muito baixo

**CB5 Você está cansado (a) de trabalhar com pacientes?**

- Sempre
- Frequentemente
- Às vezes
- Raramente
- Nunca

**CB6 Você às vezes se pergunta quanto tempo será capaz de continuar trabalhando com pacientes?**

- Sempre
- Frequentemente
- Às vezes
- Raramente
- Nunca

## Supplementary Material S2 - Factor analysis of the Copenhagen Burnout Inventory (CBI)

| Item | Factor 1 | Factor 2 |
|------|----------|----------|
| PB1  | 0.800    | -0.051   |
| PB2  | 0.860    | -0.094   |
| PB3  | 0.809    | -0.003   |
| PB4  | 0.834    | 0.014    |
| PB5  | 0.910    | -0.032   |
| PB6  | 0.711    | 0.005    |
| WB1  | 0.859    | -0.054   |
| WB2  | 0.722    | 0.120    |
| WB3  | 0.743    | 0.049    |
| WB4  | -0.558   | -0.103   |
| WB5  | 0.479    | 0.166    |
| WB6  | 0.365    | 0.385    |
| WB7  | 0.678    | 0.236    |
| CB1  | -0.075   | 0.883    |
| CB2  | 0.013    | 0.860    |
| CB3  | -0.060   | 0.930    |
| CB4  | 0.131    | 0.659    |
| CB5  | 0.056    | 0.834    |
| CB6  | 0.175    | 0.661    |

Data presented as polychoric correlations between the items.

CBI sub-dimensions: CB(x) = client-related burnout; PB(x) = personal burnout; WB(x) = work-related burnout.

Factor 1 = personal and work-related fatigue and exhaustion; Factor 2 = exhaustion which is perceived by the person as related to client/patient work.
